# Supplementary material for: Multisensory Connections of Novel Linguistic Stimuli in Japanese as a Native Language and Referential Tastes
Source: MDPI journal article supplement (doi:10.3390/ejihpe11030074), 2021-09-02
Supplement: s1 [file s1]

**Supplemental Table S1.** Japanese word stimuli (transliteration).

| Word list 1 | Word list 2 | Word list 3 | Word list 4 |
|-------------|-------------|-------------|-------------|
| ヌヨ (nuyo)   | ワユ (wayu)   | ヌセ (nuse)   | ヌニ (nuni)   |
| ネケ (neke)   | ヘオ (heo)    | ムヌ (munu)   | メフ (mefu)   |
| ルエ (rue)    | ルヨ (ruyo)   | ロユ (royu)   | ケネ (kene)   |
| ツセ (tsuse)  | テハ (teha)   | ヌチ (nuchi)  | ヌネ (nune)   |
| ネユ (neyu)   | ヘネ (hene)   | ヘヨ (heyo)   | ホヒ (hohi)   |
| ムワ (muwa)   | メヘ (mehe)   | メワ (mewa)   | ラヘ (rahe)   |
| ラユ (rayu)   | リワ (riwa)   | ルモ (rumo)   | ルラ (rura)   |
| レヌ (renu)   | レメ (reme)   | ロワ (rowa)   | エウ (eu)     |
| ケメ (keme)   | セヘ (sehe)   | ソヌ (sonu)   | テヨ (teyo)   |
| ナネ (nane)   | ヌオ (nuo)    | ヌテ (nute)   | ヌヤ (nuya)   |
| ネセ (nese)   | ノヌ (nonu)   | ヘカ (heka)   | ヘニ (heni)   |
| ヘミ (hemi)   | ホユ (hoyu)   | ミメ (mime)   | ムエ (mue)    |
| ムユ (muyu)   | メヌ (menu)   | ユム (yumu)   | ラヌ (ranu)   |
| ラヨ (rayo)   | ラレ (rare)   | リヒ (rihi)   | リヘ (rihe)   |
| ルヘ (ruhe)   | ルロ (ruro)   | レソ (reso)   | レロ (rero)   |
| ロモ (romo)   | ワソ (waso)   | エオ (eo)     | エヨ (eyo)    |
| サウ (sau)    | シヒ (shihi)  | スヌ (sunu)   | セア (sea)    |
| セネ (sene)   | ソミ (somi)   | チオ (chio)   | チニ (chini)  |
| チメ (chime)  | テヤ (teya)   | ニネ (nine)   | ニヨ (niyo)   |
| ヌト (nuto)   | ヌム (numu)   | ネア (nea)    | ネホ (neho)   |

These pseudowords associated with meaningless were selected from a previous psycholinguistic study of Japanese pseudowords [37]. The meaningfulness in the selected meaningless words ranged from 30 to 79 [37], while the non-association values in the selected meaningless words ranged from 35 to 85 [37].

**Supplemental Table S2.** Manufacturers and flavors of gustatory stimuli.

| Stimulus | Manufacturer                  | Flavor                         |
|----------|-------------------------------|--------------------------------|
| 1        | Ogontoh Co., Ltd.             | kiwi                           |
| 2        | Asahi Group Foods, Ltd.       | lemon                          |
| 3        | Meiji Sangyo Co., Ltd.        | vinegar                        |
| 4        | Oshizaka Seika Co., Ltd.      | Japanese bekko (pure caramel)  |
| 5        | Meito Sangyo Co., Ltd.        | white peach                    |
| 6        | Kanro Co., Ltd.               | Japanese citrus                |
| 7        | UHA Mikakuto Co., Ltd.        | strawberry milk                |
| 8        | NOBEL Confectionery Co., Ltd. | Lemon, including vitamin c     |
| 9        | Meiji Co., Ltd.               | dark chocolate                 |
| 10       | Sakumaseika Co., Ltd.         | apple                          |
| 11       | Ribon Co., Ltd.               | brown sugar, honey, and ginger |
| 12       | Pine Co., Ltd.                | pineapple                      |
| 13       | NOBEL Confectionery Co., Ltd. | muscat including vitamin c     |
| 14       | UHA Mikakuto Co., Ltd.        | milk                           |
| 15       | Meiji Co., Ltd.               | milk chocolate                 |
| 16       | Osakaya Seika Co., Ltd.       | soy sauce radish               |
| 17       | Asahi Group Foods, Ltd.       | calpis                         |
| 18       | First Japan Co., Ltd.         | butterscotch                   |
| 19       | Ribon Co., Ltd.               | plum                           |
| 20       | Chikuho Seika Co., Ltd.       | caramel                        |

These gustatory stimuli were used in the evaluation phase and learning phase of G condition.

**Supplemental Table S3.** Results of correlation analyses ( $n = 13$ ).

|     | SW      | H       | C      | SO     | AS      | F       | P       | AR      | D     | SR     | RT    | SFR |
|-----|---------|---------|--------|--------|---------|---------|---------|---------|-------|--------|-------|-----|
| SW  | 1       |         |        |        |         |         |         |         |       |        |       |     |
| H   | -0.23** | 1       |        |        |         |         |         |         |       |        |       |     |
| C   | -0.13*  | 0.19**  | 1      |        |         |         |         |         |       |        |       |     |
| SO  | -0.18** | 0.10    | 0.56** | 1      |         |         |         |         |       |        |       |     |
| AS  | -0.34** | 0.02    | -0.11  | 0.02   | 1       |         |         |         |       |        |       |     |
| F   | 0.56**  | -0.29** | 0.07   | -0.02  | -0.39** | 1       |         |         |       |        |       |     |
| P   | 0.60**  | -0.25** | 0.04   | -0.02  | -0.45** | 0.81**  | 1       |         |       |        |       |     |
| AR  | -0.35** | 0.13*   | 0.27** | 0.52** | 0.32**  | -0.33** | -0.34** | 1       |       |        |       |     |
| D   | 0.56**  | -0.29** | 0.08   | 0.01   | -0.45** | 0.79**  | 0.85**  | -0.32** | 1     |        |       |     |
| SR  | -0.07   | -0.01   | -0.04  | -0.04  | 0.09    | -0.10   | -0.08   | -0.09   | -0.03 | 1      |       |     |
| RT  | -0.01   | -0.06   | 0.09   | 0.07   | 0.07    | 0.08    | 0.04    | 0.00    | 0.02  | -0.08  | 1     |     |
| SFR | -0.14*  | -0.02   | 0.03   | -0.05  | -0.02   | -0.04   | -0.09   | 0.00    | -0.09 | 0.17** | -0.02 | 1   |

SW: sweetness; H: hardness; C: coolness; SO: sourness; AS: astringency; F: familiarity; P: preference; AR: arousal; D: deliciousness; SR: successful recognition; RT: response

time of recognition memory phase; SFR: successful free recall.

\*\*  $p < 0.01$ ; \*  $p < 0.05$ .
